1 **Prioritizing persistent microbiome members in the common bean rhizosphere: an integrated**  
2 **analysis of space, time, and plant genotype**

3

4 Nejc Stopnisek<sup>1,2,3</sup> and Ashley Shade<sup>1,2,3,4,5</sup>

5 1. Department of Microbiology and Molecular Genetics, Michigan State University, East  
6 Lansing, MI 48840 USA

7 2. The Plant Resilience Institute, Michigan State University, East Lansing, MI 48840

8 3. The DOE Great Lakes Bioenergy Research Center, Michigan State University, East  
9 Lansing, MI 48840

10 4. Program in Ecology, Evolutionary Biology and Behavior, Michigan State University, East  
11 Lansing, MI 48840

12 5. Department of Plant, Soil and Microbial Sciences, Michigan State University, East Lansing,  
13 MI 48840

14

15 *Corresponding author: shadeash@msu.edu*

16

17 *Keywords: plant-microbiome, Phaseolus vulgaris, plant health, neutral model, co-occurrence*  
18 *network, abundance-occupancy, 16S rRNA, ITS, hub taxa, sustainable agriculture, core*  
19 *microbiome*

20

21

22 **Abstract**

23         The full potential of managing microbial communities to support plant health is yet-  
24 unrealized, in part because it remains difficult to ascertain which members are most important for  
25 the plant. However, microbes that consistently associate with a plant species across varied field  
26 conditions and over plant development likely engage with the host or host environment. Here, we  
27 applied abundance-occupancy concepts from macroecology to quantify the core membership of  
28 bacterial/archaeal and fungal communities in the rhizosphere of the common bean (*Phaseolus*  
29 *vulgaris*). Our study investigated the microbiome membership that persisted over multiple  
30 dimensions important for plant agriculture, including major growing regions, plant development,  
31 annual plantings, and divergent genotypes, and also included re-analysis of public data. We found  
32 48 core bacterial taxa that were consistently detected in all samples, inclusive of all datasets and  
33 dimensions. This suggests reliable enrichment of these taxa to the plant environment and time-  
34 independence of their association with the plant. More generally, this work provides a robust  
35 approach for systematically prioritizing core microbiome memberships in any host or system.

## 36 **Introduction**

37 Agriculture requires more efficient use of available resources, and the naturally occurring,  
38 soil-dwelling microbiota offers potential to contribute to the responsible intensification of  
39 agriculture. Selection and breeding of plants for their beneficial associations with microbiota has  
40 promise to deliver a new generation of microbe-improved plants [1–6]. The ideal outcome of such  
41 efforts would achieve a balance of sustainable agriculture with food security. To achieve this, we  
42 must understand the relationships between plants and their associated microbiomes, including the  
43 differentiation of key or “core” members that engage with the plant directly from transient or  
44 opportunistic members that do not.

45 Common bean (*Phaseolus vulgaris* L.) is the most important food legume grown  
46 worldwide, and especially for developing economies in South America, Africa and Asia [7]. The  
47 origin of common bean is central Mexico, and from there it spread to central and to south America  
48 around 165,000 years ago [8]. This resulted in the development of two major and eco-  
49 geographically distinct common bean gene pools with partial reproductive isolation [9–11]. The  
50 Mesoamerican gene pool was distributed from northern Mexico to Colombia and the Andean gene  
51 pool ranged from southern Peru to northwestern Argentina. Since 8,000 years ago, each pool was  
52 separately and selectively bred, leading to further diversification between them [8, 12, 13]. Because  
53 of pre-existing genetic differences in each gene pool followed by divergent breeding history,  
54 common bean presently offers a distinctive opportunity for understanding how the host and the  
55 environment contribute to rhizosphere microbiome assembly.

56 The objective of this study was to apply approaches from macroecology to prioritize the  
57 persistent members of a core bacterial, archaeal, and fungal root microbiome inclusive of multiple  
58 gradients and categories of drivers expected to be important for plant agriculture. With the  
59 cooperation of the U.S. Bean coordinated agricultural project (Bean CAP), we executed a first-of-

60 its kind study of two divergent bean genotypes grown under field conditions in five major North  
61 American bean growing regions, including Michigan, Nebraska, Colorado and Washington. These  
62 two genotypes belong to the Mesoamerican (Eclipse genotype) and Andean (California Early Light  
63 Red Kidney, CELRK genotype) gene pools that represent the major divergences from the wild  
64 bean ancestor [8]. For these two divergent genotypes, we also assessed how core members of the  
65 root microbiome changed over plant development and root compartment. We also used public data  
66 to perform a comparative analysis of the bacterial microbiome found in our study with microbiome  
67 members detected in other bean genotypes grown in South America [14, 15]. From our effort that  
68 was inclusive of both broad biogeography (including the U.S. and Colombia), plant development,  
69 and inter-annual plantings, we discovered a core bean rhizosphere microbiome of 48 members that  
70 persistently associated with this nutritionally, agronomically, and economically important crop.  
71 This core was discovered in spite of apparent microbiome differences that were attributable to local  
72 soil conditions and management. However, we did not detect an influence of plant genotype,  
73 suggesting that this core membership supersedes it.

## 74 **Material and Methods**

### 75 *Study design, sampling and soil physicochemical analysis*

76 We designed a biogeography study of two divergent bean genotypes (from Mesoamerican  
77 and Andean gene pools [16, 17]), both grown in the field in the summer of 2017 at five research  
78 and extension farms that represent major U.S. bean production regions (**Table 1**) [18]. The research  
79 and extension farms were: Saginaw Valley (SVERC), Michigan (MI), Montcalm county (MRF),  
80 MI, Scott Bluff county, Nebraska (NE), Fort Collins, Colorado (CO), and Othello, Washington  
81 (WA).

82 Triplicate bean plants were grown in each of three (MI, WA, CO), or four (NE) plots,  
83 totaling 9 or 12 plants per growing location. Plants were harvested at flowering stage (mid to late  
84 July) because we wanted to analyze mature microbial communities and control for potential  
85 differences in the microbiome over early plant development.

86 We selected two common bean cultivars with very distinct genotypes: Eclipse [16] of  
87 Mesoamerican origin and California Early Light Red Kidney (CELRK), an old kidney bean  
88 landrace of Andean origin [17]. Even though we included only two bean genotypes, we selected  
89 highly divergent genotypes from far ends of the spectrum of the common bean genetic diversity;  
90 these lineages diversified after a biogeographic bottleneck that separated them between Central and  
91 South America [19]. We hypothesized that if there was an effect of bean genotype on the root  
92 microbiome, it should be measurable when comparing these genotypes from divergent lineages.  
93 Both bean genotypes were grown in each growing location, except in Michigan, where CELRK  
94 was grown at Saginaw Valley and Eclipse at Montcalm county.

95 Plant roots with attached soil were packed into bags, stored on ice and shipped immediately  
96 to Michigan State University for processing. From each sample, root-attached soil was collected by  
97 gently shaking the roots and designated as rhizosphere soil; unattached root-zone soil was also

98 collected and used as bulk soil. It was expected that the rhizosphere soil contains a subset of  
99 microbiome diversity that is recruited from the bulk soil [20] but we note that these soils were not  
100 “bulk” in the traditional definition, in that they were collected from the agricultural fields and  
101 expected to be proximal to and influenced by the roots of previous crops. Soils were sieved through  
102 4 mm sieves to remove any plant debris and larger soil minerals before soil physical-chemical  
103 analysis. Soil analysis was done at the Michigan State Soil Plant and Nutrient Laboratory on root-  
104 zone soil samples pooled by plant genotype and plot (see Supporting Text for details).

105 We designed a second temporal study to assess the dynamics of the core taxa over plant  
106 development. The two bean genotypes, CELRK and Eclipse, were grown at the same two sites in  
107 Michigan, U.S., Montcalm county and Saginaw Valley, in the summer of 2018. Plants root systems  
108 were harvested at 5 growth stages, including stage 1: V2 (appearance of second trifoliolate), stage 2:  
109 V5 (appearance of fifth trifoliolate), stage 3: flowering, stage 4: pod filling, and stage 5:  
110 senescence/drying). At each sampling time, roots were collected and transported on ice to the  
111 laboratory for immediate processing. Rhizosphere soil was collected by gently shaking roots, as  
112 described above. Any remaining, tightly-attached soil was designated as rhizoplane soil, and was  
113 collected by first vortexing roots in 1x phosphate buffer solution (PBS) for 4 min and finally  
114 removing the supernatant after centrifugation for 10 min at 8000 g and 4°C. Collected soil was  
115 immediately frozen in liquid nitrogen and stored at -80°C.

116

### 117 *Microbiome sequencing and analysis*

118 There were 31 rhizosphere (attached to the root and pooled by plot) and 8 root-zone/bulk  
119 (one pooled sample per growing location and plant genotype) soil samples sequenced for  
120 microbiome analysis from the biogeography study, and 125 rhizosphere and 127 rhizoplane soil  
121 (individual plants) samples sequenced from the plant development study. DNA extractions,

122 including negative controls, were performed as per standard soil protocols (see Supporting Text for  
123 details). 16S rRNA gene amplicon and ITS amplicon sequencing was performed at the Michigan  
124 State Genomics Core Research Support Facility. We processed the 16S rRNA gene amplicons  
125 using an open-reference clustering first against the SILVA v128 database [21, 22]. First, raw reads  
126 were merged, quality filtered, dereplicated, and clustered into 97% identity operational taxonomic  
127 units (OTUs) using the UPARSE pipeline (version 11, [23]). Reads not matching to the SILVA  
128 database were used for de-novo clustering at 97% sequence identity. Reference picked and de-novo  
129 reads were combined before taxonomy was assigned [21]. Taxonomic annotations for 16S rRNA  
130 gene OTU representative sequences were assigned in the QIIME 1.19 environment [24] using  
131 SILVA database [22]. ITS OTU representative sequences were taxonomically annotated using the  
132 CONSTAX tool [25] with the UNITE database version 7.2 [26]. OTUs with unassigned taxonomy  
133 at the domain level and OTUs annotated as mitochondria or chloroplasts were removed.  
134 Contaminant OTUs were removed using decontam package in R [27]. Additionally, we performed  
135 zero-radius OTU analysis (aka ZOTUs that are clustered at 100% sequence identity) for reads  
136 detected within the core OTUs. In short, first we subset all reads that were included within the core  
137 OTUs and processed them through the UNOISE3 pipeline [28] to create ZOTUs. Then we  
138 determined each ZOTU's affiliation to their originating core OTU by matching the read identities  
139 between ZOTU and OTU clusters using a customized code (see GitHub repository).

140 Statistical analysis, including abundance-occupancy analysis to detect a core microbiome  
141 [29], and data visualization were performed in R (see Supporting Text). The co-occurrence network  
142 and global network properties were calculated using the Molecular Ecological Network Analysis  
143 Pipeline (MENAP) [30] and visualized with Cytoscape v.3.5.1 [31]. Comparative analyses with  
144 published datasets from Pérez-Jaramillo et al. [15] (BioProject ID PRJEB26084). was performed  
145 by downloading study raw reads from NCBI and processing as per our data pipeline to analyze

146 both sets identically. An expanded description of all ecological statistics, MENAP parameters, and  
147 our combined core microbiome analysis with public data are provided in Supporting Text.

148

#### 149 *Data and code availability*

150 The raw sequence data are deposited in the NCBI Sequence Read Archive (BioProject ID  
151 PRJNA524532). All read processing steps, bioinformatic workflows, R code, and custom scripts  
152 are available on GitHub  
153 ([https://github.com/ShadeLab/PAPER\\_Stopnisek\\_2019\\_BeanBiogeography](https://github.com/ShadeLab/PAPER_Stopnisek_2019_BeanBiogeography)).

154

## 155 **Results**

### 156 *Sequencing summary and microbial diversity across growing regions*

157 There were 31,255 to 506,166 and 22,716 to 252,810 reads per sample for 16S rRNA and  
158 ITS biogeography datasets, respectively. We rarefied samples to 31,255 reads for 16S rRNA gene  
159 amplicons and to 22,716 for ITS. With these thresholds, we achieved richness asymptotes for both  
160 datasets, suggesting that sequencing efforts were sufficient to capture comparative dynamics and  
161 diversity (**Fig. S1**). The total richness observed at this rarefaction depth was 1,505 fungal and  
162 23,872 bacterial and archaeal OTUs.

163 As reported in other rhizosphere studies, the total fungal diversity was lower than bacterial  
164 /archaeal diversity in the rhizosphere of the common bean [32–34]. Richness varied by growing  
165 location (ANOVA, F value=12.4,  $p$ -value<0.0001 and F value=13.1,  $p$ -value<0.0001 for 16S  
166 rRNA and ITS data, respectively, **Fig. S2**) but was highest at the Montcalm Research Farm  
167 (Michigan, US) for both, bacteria/archaea and fungi. An analysis of community beta diversity  
168 revealed strong biogeographic patterns in community structure explained by location, soil pH and  
169 fertilization, in agreement with other literature [35–38] (**Fig. S3**, see **Supplemental Text**).



170 However, an influence of plant genotype was either weak or not detected, which we partially  
171 attribute to plant growth in field conditions, following observations made in other plant species  
172 grown under field conditions [35, 36, 39] (**Fig. S2BD**, see **Supplemental Text**).

173 The common bean rhizosphere microbiome included the major expected lineages for both  
174 bacteria and fungi (**Fig. S4AB**), in agreement with other plant rhizosphere studies [40–45].  
175 Together with previous studies, these data provide more evidence that root-associated microbial  
176 taxa are phylogenetically and potentially functionally conserved [46]. Proteobacteria,  
177 Acidobacteria, Bacteroidetes, and Actinobacteria collectively comprised on average 73.5% of the  
178 bacteria/archaeal community, Ascomycota dominated the fungal community with a mean total  
179 relative abundance of 53% with notable sample-to-sample variance (range from 16.5% to 84.5%).

180

181 *A core rhizosphere microbiome is detected across U.S. bean growing regions*

182 We noticed a large number of OTUs that were shared among all growing locations them for  
183 the bacterial/archaeal communities (2,173 taxa, mean 31.5%, range 29.5% to 34.7%). There was a  
184 smaller but notable overlap for the fungal communities (70 taxa or mean 4.5%, range from 0.9% to  
185 17.9%; **Fig. S4CD**). These data suggested that, despite measured edaphic differences across  
186 growing locations and strong biogeographic signal, the common bean rhizosphere recruited many  
187 similar taxa that could be functionally important for the bean. Therefore, we explored abundance-  
188 occupancy distributions of taxa ([47, 48] and references therein) to infer the core bean microbiome  
189 of taxa with an occupancy of 1 (i.e., found in all soil samples, all plots and across all growing  
190 locations; **Fig. 1AB**). Among bacteria and archaea, 258 phylogenetically diverse taxa were  
191 cosmopolitan in the dataset (**Fig. 1C**), including numerous and abundant Proteobacteria (117  
192 OTUs) with a dominant taxon classified as *Arthrobacter* sp. (FM209319.1.1474, mean relative  
193 abundance of 1.43%). The bacterial/archaeal core also contained taxa of interest for potential plant

194 benefits (e.g. *Sphingomonas*, *Rhizobium*, *Bacillus*, *Streptomyces*), as well as some genera that can  
195 be associated with disease (e.g. *Ralstonia*). There were 13 taxa in the fungal core (**Fig. 1D**), and  
196 these were largely composed of Ascomycota (10 OTUs), with dominating taxon OTU823 from the  
197 *Phaeosphaeriaceae* family (mean relative abundance 10.1%). Notably, taxa that were unique to  
198 either bean genotype were relatively rare and inconsistently detected (**Fig. 1**, orange and black  
199 points). Together, these results suggest that common bean consistently recruits particular  
200 microbiome taxa.

201       Next we wanted to investigate if the prioritized core taxa are indeed selected by the plant  
202 environment or assembled through neutral processes by applying the Sloan neutral model [49, 50].  
203 The neutral expectation of abundance-occupancy distributions is that very abundant taxa will have  
204 high occupancy, while rare taxa will have low [48–51]. Taxa that deviate from the neutral  
205 expectation are more strongly influenced by deterministic factors, like environmental conditions,  
206 than by stochastic factors, like drift and dispersal. The neutral model fit of the abundance-  
207 occupancy distribution (solid line, **Fig. 1AB**) identified several taxa that had frequencies either  
208 above or below the 95% confidence intervals of the model (dashed lines). Specifically, 13.7% of  
209 the bacterial/archaeal and 30.4% of fungal taxa, deviated from the neutral expectation (**Table S3**).  
210 One hundred and seventy-one core taxa were predicted above the neutral model partition; these  
211 deterministically-selected taxa are prime candidates for follow-up studies of interactions with the  
212 host plant. Overall, the bacteria/archaea community had better fit to the neutral expectation than  
213 fungal ( $R^2$  of 0.74 and 0.34, and migration rates ( $m$ ) of 0.301 and 0.003, respectively), suggesting  
214 that dispersal was relatively less limiting for the bacteria/archaea than for the fungi. This finding  
215 agrees with other work suggesting that fungi are more sensitive to local climate or more dispersal  
216 limited than bacteria [52–55].

217

218 *A core rhizosphere microbiome is detected for common bean grown on different continents*

219 We wanted to better understand if these U.S. core taxa were associated with the bean  
220 rhizosphere across a larger geographical scale, which would suggest the potential for selective plant  
221 recruitment and cosmopolitan distribution of core taxa. Therefore, we compared our U.S. data to a  
222 recently published study of rhizosphere bacteria and archaea from common beans grown in  
223 Colombian agricultural soil [14]. The Colombian study offered a key contrast because it included  
224 eight divergent bean lineages, including wild (n=2), landrace (n=1), and cultivated genotypes  
225 (n=5), grown in soil from a different continent that has starkly different climate and management  
226 from the U.S. growing regions. To enable direct comparison, we re-analyzed raw reads and  
227 compared the datasets by matching to either the same taxon identifiers when clustered to SILVA  
228 database, or 100% identity by BLAST to *de novo* clustered reads (see Materials and Methods).  
229 Surprisingly, 39.6% (3,359 OTUs) of rhizosphere taxa from the Colombian-grown beans were also  
230 shared with the U.S. dataset (**Fig. 2**). Both datasets included taxa that were highly represented in  
231 the other: 62% of U.S. core (159 out of 258) were found also in Colombia, and 51% of Colombian  
232 core (433 out of 848) were shared with the U.S. (**Fig. 2A**). Core taxa were again defined stringently  
233 with an occupancy of 1, and 48 taxa were found across all samples, inclusive of both datasets. We  
234 refer to this as the “global” core to distinguish the subset from the larger group of core taxa  
235 inclusive to the US only (though note that this descriptor is for simplicity and that this does not  
236 include global representation of bean root samples on Earth). These global core taxa were  
237 composed of many Proteobacteria, with *Rhizobiales* showing the most consistent relative  
238 abundance between the studies (**Fig. 2B**, e.g. 0.187% and 0.138% in Colombia and U.S. dataset,  
239 respectively). Notably, none of this global core taxa were universally detected in very high  
240 abundance, and all but two OTUs (a U.S. *Arthrobacter* sp. and a Colombian *Austrofundulus*  
241 *limnaeus* with mean relative abundances of 1.43% and 1.01%, respectively) would be classified as

242 rare by a typical mean relative abundance threshold below 1%, hinting to a potential role of rare  
243 taxa in providing key functions. A similar observation was made with rhizosphere microbiota of 19  
244 herbaceous plant species, in which taxa of low abundance were among those significantly enriched  
245 in the rhizosphere as compared to the bulk soil [56]. Notably, only 48% of these global core taxa  
246 have genus classification, suggesting that most of them are under-described in their functional  
247 potential and interactions with plants (**Table S4**).

248 We also analyzed reads associated with the global core taxa with the UNOISE3 pipeline  
249 [28] to generate predicted biological sequences (zero-radius OTUs – ZOTUs with 100% sequence  
250 identity) and provide the maximal possible biological resolution. We found that the global core  
251 taxa consisted of 422 ZOTUs, and that there was a range of 2 to 35 ZOTUs identified within each  
252 OTU (**Fig. S5**). With one exception (HQ597858.1.1508), all of core OTUs (clustered at 97%  
253 sequence identity) contained at least one ZOTU that also had an occupancy of 1. In addition, all of  
254 the ZOTUs with an occupancy of 1 were also the most abundant ZOTUs within each OTU (**Fig.**  
255 **S5**). This result suggests that the same members constitute the core even with increased taxonomic  
256 resolution.

257 A recent study considered the effect of the common bean domestication history on the root  
258 microbiome and identified a core set of microbial taxa that are consistently present with these  
259 diverse bean genotypes, including bacterial taxa recruited from agricultural and natural soil from  
260 Colombia [15]. This core also had high representation of *Proteobacteria*, *Acidobacteria*,  
261 *Actinobacteria* and *Verrucomicrobia*, similar to those observed in the present study. We also re-  
262 analyzed these data and show that 46 (out of 48) of the global core taxa identified here have  
263 occupancy > 0.9 across all three included studies (the present study, Pérez-Jaramillo et al. [14] and  
264 Pérez-Jaramillo et al. [15]). Forty-two of these taxa had the highest possible occupancy of 1, but  
265 only within rhizosphere samples from agricultural soils (**Table S4**). When incorporating data from

266 beans grown in forest soils, the average occupancy decreases to 0.77 (median 0.75, min = 0.53).  
267 However, 14 taxa still had an occupancy of 1 when including beans grown in forest soils (**Table**  
268 **S4**).

269 In summary, these results show that common bean can associate with a core set of  
270 rhizosphere microbiome members at taxon and ecotype levels, across diverse bean genotypes and  
271 across continents. Additionally, these core taxa are likely enriched by the host in managed soils, as  
272 suggested by their higher occupancy in agroecosystems.

273  
274 *Core taxa are enriched in the rhizoplane and are consistently detected across bean development*

275 To identify the common bean core taxa over space (a biogeographic core) we sampled  
276 plants across growing locations at the same growth stage (flowering) and focused on the  
277 rhizosphere compartment. However, the question remained whether these core taxa are detected  
278 beyond that particular plant development stage. To answer this question, we conducted a field  
279 experiment to assess the core taxa over time in plant development stage. In the next growing season  
280 (2018), we used the same divergent bean genotypes grown at both Michigan, U.S, locations  
281 (Montcalm and Saginaw Valley; see Material and Methods). We harvested root systems at 5  
282 different plant development stages including flowering stage. We investigated the relative  
283 abundance of the global core taxa and the U.S.-specific core taxa in both rhizosphere (soil that  
284 could be removed from the root after shaking, n=125 samples) and rhizoplane (soil adhered to the  
285 root tissue and removed via vortex in buffer, n=127 samples) compartments to determine their  
286 ability to closely associate with the plant tissue. The range of the rhizosphere sequencing depth was  
287 7,905-78,436 reads per sample, and for the rhizoplane it was 32-189,433 reads per sample. We  
288 rarefied to 15,000 reads per samples (i.e. samples reaching richness asymptote), resulting in loss of

289 3 rhizosphere and 7 rhizoplane samples for a final dataset of 122 rhizosphere and 120 rhizoplane  
290 samples. The total richness observed was 36,022 bacterial and archaeal OTUs.

291 From this development time series, we found that all 48 global core taxa were detected a  
292 year later on these two Michigan farms. The collective relative abundances of the global core taxa  
293 were significantly higher in the rhizoplane as compared to the rhizosphere irrespective of the plant  
294 development stage, bean genotype and growing location (**Fig. 3A**). Interestingly, the remaining US  
295 core taxa that were found exclusively in the U.S. dataset at an occupancy of 1 were equally  
296 abundant in the rhizosphere and rhizoplane at both Michigan growing locations (**Fig. 3A**).

297 We next asked whether there were enrichments of particular core taxa by plant development  
298 stage, root compartment, or growing location (**Fig. 3B**). On balance, almost all core taxa showed  
299 some growth stage preference, but these trends were specific to each growing location and root  
300 compartment. Despite these nuances, all core taxa were consistently found with high occupancy  
301 inclusive of the plant development series (**Fig. S6**).

302 Together these results suggest that these core taxa are selected by the plant early in the  
303 development stage and maintained. Enrichment of the core taxa in the rhizoplane further supports  
304 the hypothesis that these core taxa engage closely with the host plant.

305

306 *Core taxa are not hub or connector taxa in an inter-domain microbiome network*

307 Network analysis has been proposed to be a useful method to identify important members  
308 of the plant microbiome with beneficial traits [57–59]. Hub taxa, identified by their high  
309 connectivity with many members of the community, are regarded as the most important part of the  
310 community and influence network structure and community stability [60, 61]. We applied this  
311 method to ask if any of the core taxa that we identified using abundance-occupancy were also key  
312 for co-occurrence network structure. Additionally, we were interested in identifying fungal-

313 bacterial co-occurrences because of reports of their potential benefits for the plant [62, 63]. To  
314 explore these patterns we applied the molecular ecology network analysis pipeline (MENAP)  
315 which constructs ecological association network through random matrix theory (RMT) [30]. We  
316 merged rarified 16S and ITS rhizosphere datasets, filtered the datasets to include taxa with  
317 occupancy greater than or equal to 50%, and considered only interactions significant at  $p$ -  
318 value  $< 0.05$  and RMT threshold of 0.88. The resulting network included 572 taxa (nodes) and 1,857  
319 statistically significant co-occurrences (edges) structured among 52 modules. Most of the modules  
320 were relatively small, with only six including more than 10 nodes (**Fig. 4**). The network was scale-  
321 free (i.e. characteristics of the network are independent of the size of the network) and had small-  
322 world characteristics (i.e. highly clustered) as indicated by the node degree distribution fitting to  
323 the power law model ( $R^2 = 0.993$ ), and also had significant deviation of the modularity, length and  
324 clustering coefficients from those calculated from random network (i.e. same number of nodes and  
325 edges), respectively (**Table S5**).

326 The topological role of each taxon within the network was determined by the relationship  
327 between their within-module ( $Z_i$ ) and among-module ( $P_i$ ) connectivity scores as described in [64].  
328 Based on this, the majority of taxa were peripheral (potentially, specialists; 563 nodes) (**Fig. 4A**).  
329 There were also 3 connectors and 6 module hubs, but no network hubs. Indeed, in agreement with  
330 the beta-diversity analysis (**Fig. S3**, Supporting Materials), there was a strong geographic signal in  
331 the largest four modules, and these were comprised mostly of bacterial-bacterial (rather than  
332 bacterial-fungal or fungal-fungal) hypothesized interactions (**Fig. 4B**). We note that cross-domain  
333 edges constituted only a small fraction of all co-occurrences ( $n=168$ ; bacteria-fungi=156, archaea-  
334 bacteria=6 and archaea-fungi=6).

335 The analysis identified 26 co-occurrences between core taxa. However, we were surprised  
336 to find that only two bacterial core and no fungal core taxa were also classified as network hubs

337 (taxa that connect to many other taxa within a modules) or connectors (taxa that connect across  
338 modules). As exceptions, core *Chitinophagaceae* taxon FR749720.1.1492 was a module hub node  
339 and a *Nitrobacter* sp. GDHX01215817.4.1477 was a connector. Our results, inclusive of a dataset  
340 of divergent plant genotypes and broad biogeography, suggest that while hub and connector taxa  
341 may be important for the maintenance of the root microbiome, these taxa are not consistently  
342 detected in the common bean rhizosphere and, by deduction, could not be of universal importance  
343 for the host plant. Our study cannot speak to the potential for functional redundancy among hub or  
344 connector taxa, which could ultimately suggest a functional core among phylogenetically diverse  
345 taxa [65]. Taken together, these results suggest that core taxa likely are important for the plant,  
346 while hub and connector taxa are important for the integrity of the soil microbial community and its  
347 responses to the local environment.

348

## 349 **Discussion**

350 Numerous studies have aimed to detect core microbiome members for various plants and  
351 animals (see references within [29, 66]). Because methods are inconsistent across studies and  
352 because the parameters used to define a core are often arbitrary, there is some question as to how  
353 robust or useful such studies may be. For these reasons, it has become easy to overlook new studies  
354 that claim to have discovered a core microbiome for their system. If every study or design results in  
355 a different core microbiome, how can the research build to move forward?

356 Here, we applied concepts from macroecology to prioritize, for the first time, a core plant  
357 microbiome that persists at across growing locations on two continents, over plant development,  
358 over two years of annual plantings at two different farms, across highly divergent plant genotypes,  
359 and also across datasets collected by different research groups. Furthermore, core members were  
360 enriched in the rhizoplane, and not just the rhizosphere. These multiple and consistent lines of



361 evidence provide strong support that these taxa likely engage with the plant and also demonstrate  
362 the robustness of the abundance-occupancy method to discover core members.

363 A majority of the 48 core bacterial taxa among these common bean rhizospheres are under-  
364 described or largely unknown, as only 23 out of 48 have a genus-level classification. But, due to  
365 their ubiquitous association with the bean over space and time, we hypothesize that these taxa  
366 provide functions that are crucial for common bean health and should be targeted for microbiome  
367 management of in support of common bean productivity and wellness. To test this hypothesis  
368 further research is needed, but plant-beneficial traits have been previously reported for members of  
369 the genera that we identified as part of the bean core microbiome. For example, members  
370 belonging to the genera *Mesorhizobium* and *Rhizobium* are known symbiotic nitrogen fixers of  
371 legumes [67, 68], *Ramlibacter* sp. have the ability to promote P mobilization [69], and *Variibacter*,  
372 *Novosphingobium* and *Sphingomonas* sp. harbor many specialized genes indicating their  
373 relationship with plant hosts [70–72].

374 Discovering these core taxa is a first step in a rich line of inquiry to understand host  
375 engagement with them. The next steps are to understand functions associated with these taxa and to  
376 determine how they contribute to plant health and productivity under different growth conditions,  
377 such as drought or with particular management strategies [39, 73]. These steps will include  
378 cultivation dependent and independent approaches aimed to enrich and isolate core members,  
379 assemble or bin genomes from isolates and metagenomes, annotate functional genes on both  
380 chromosomes and plasmids, link functions and activities through transcript or metabolome  
381 analyses, and perform experiments with constructed communities of core members to test  
382 hypotheses about microbiome engagement with and benefits to the plant.

383 To conclude, this work provides robust approaches and general insights for prioritizing core  
384 microbiome members, and that also advance goals in plant-microbiome management and microbe-  
385 improved crops by providing insights into core member identities and dynamics.

386

387

### 388 **Acknowledgments**

389 This work was supported by the Plant Resilience Institute at Michigan State University. We  
390 are grateful to Dr. James Kelly, Dr. Phillip Miklas, Dr. James J. Heitholt, Dr. Carlos Urrea Florez,  
391 Dr. Mark A. Brick, Dr. Juan M. Osorno, Dr. Thomas H Smith and other supporting staff at the  
392 research extension farms for their partnership in this study. We would also like to thank the  
393 Michigan State Genomics Core Research and Technology Support Facility and the Institute for  
394 Cyber-Enabled Research High Performance Computing Center for excellent support and service.  
395 AS acknowledge support from Michigan State AgBioResearch (Hatch).

396

### 397 **Competing Interests**

398 The authors declare no conflict of interest.

399

### 400 **Author contributions**

401 N.S. and A.S. designed research, analyzed data and wrote the paper; and N.S. performed research.

402

403 *Supporting Text, Figures, and Tables accompany this manuscript.*

404

405 **References**

- 406 1. Dessaux Y, Grandclément C, Faure D. Engineering the Rhizosphere. *Trends Plant Sci* 2016;  
407 **21**: 266–278.
- 408 2. Gopal M, Gupta A. Microbiome Selection Could Spur Next-Generation Plant Breeding  
409 Strategies. *Front Microbiol* 2016; **7**: 1971.
- 410 3. Compant S, Samad A, Faist H, Sessitsch A. A review on the plant microbiome: Ecology,  
411 functions, and emerging trends in microbial application. *J Adv Res* 2019; **19**: 29–37.
- 412 4. Wille L, Messmer MM, Studer B, Hohmann P. Insights to plant-microbe interactions  
413 provide opportunities to improve resistance breeding against root diseases in grain legumes.  
414 *Plant Cell Environ* 2019; **42**: 20–40.
- 415 5. Busby PE, Soman C, Wagner MR, Friesen ML, Kremer J, Bennett A, et al. Research  
416 priorities for harnessing plant microbiomes in sustainable agriculture. *PLOS Biol* 2017; **15**:  
417 e2001793.
- 418 6. Kroll S, Agler MT, Kemen E. Genomic dissection of host–microbe and microbe–microbe  
419 interactions for advanced plant breeding. *Curr Opin Plant Biol* 2017; **36**: 71–78.
- 420 7. Broughton WJ, Hernández G, Blair M, Beebe S, Gepts P, Vanderleyden J. Beans (*Phaseolus*  
421 spp.) – model food legumes. *Plant Soil* 2003; **252**: 55–128.
- 422 8. Schmutz J, McClean PE, Mamidi S, Wu GA, Cannon SB, Grimwood J, et al. A reference  
423 genome for common bean and genome-wide analysis of dual domestications. *Nat Genet*  
424 2014; **46**: 707–713.
- 425 9. Rendón-Anaya M, Montero-Vargas JM, Saburido-Álvarez S, Vlasova A, Capella-Gutierrez  
426 S, Ordaz-Ortiz JJ, et al. Genomic history of the origin and domestication of common bean  
427 unveils its closest sister species. *Genome Biol* 2017; **18**: 60.
- 428 10. Bitocchi E, Rau D, Bellucci E, Rodriguez M, Murgia ML, Gioia T, et al. Beans (*Phaseolus*

- 429 ssp.) as a Model for Understanding Crop Evolution. *Front Plant Sci* 2017; **8**: 722.
- 430 11. Bitocchi E, Nanni L, Bellucci E, Rossi M, Giardini A, Zeuli PS, et al. Mesoamerican origin  
431 of the common bean (*Phaseolus vulgaris* L.) is revealed by sequence data. *Proc Natl Acad*  
432 *Sci* 2012; **109**: 788–796.
- 433 12. Kwak M, Gepts P. Structure of genetic diversity in the two major gene pools of common  
434 bean (*Phaseolus vulgaris* L., Fabaceae). *Theor Appl Genet* 2009; **118**: 979–992.
- 435 13. Bitocchi E, Bellucci E, Giardini A, Rau D, Rodriguez M, Biagetti E, et al. Molecular  
436 analysis of the parallel domestication of the common bean (*Phaseolus vulgaris*) in  
437 Mesoamerica and the Andes. *New Phytol* 2013; **197**: 300–313.
- 438 14. Perez-Jaramillo JE, Carrion VJ, Bosse M, Ferrao LF V, de Hollander M, Garcia AAF, et al.  
439 Linking rhizosphere microbiome composition of wild and domesticated *Phaseolus vulgaris*  
440 to genotypic and root phenotypic traits. *ISME J* 2017.
- 441 15. Pérez-Jaramillo JE, de Hollander M, Ramírez CA, Mendes R, Raaijmakers JM, Carrión VJ.  
442 Deciphering rhizosphere microbiome assembly of wild and modern common bean  
443 (*Phaseolus vulgaris*) in native and agricultural soils from Colombia. *Microbiome* 2019; **7**:  
444 114.
- 445 16. NDSU Agriculture. Eclipse Black Bean. 2004. Fargo.
- 446 17. McClean P, Myers J. Pedigrees of dry bean cultivars, lines and PIs. *Annu Rep Bean Improv*  
447 *Coop* 1990; **33**: 23–25.
- 448 18. USDA. United States Department of Agriculture National Agricultural Statistics Service  
449 Crop Production 2016 Summary. 2017.
- 450 19. Cichy KA, Porch TG, Beaver JS, Cregan P, Fourie D, Glahn RP, et al. A Diversity Panel for  
451 Andean Bean Improvement. *Crop Sci* 2015; **55**: 2149.
- 452 20. Sasse J, Martinoia E, Northen T. Feed Your Friends: Do Plant Exudates Shape the Root

- 453 Microbiome? *Trends Plant Sci* 2017.
- 454 21. Rideout JR, He Y, Navas-Molina JA, Walters WA, Ursell LK, Gibbons SM, et al.  
455 Subsampled open-reference clustering creates consistent, comprehensive OTU definitions  
456 and scales to billions of sequences. *PeerJ* 2014; **2**: e545.
- 457 22. Quast C, Pruesse E, Yilmaz P, Gerken J, Schweer T, Yarza P, et al. The SILVA ribosomal  
458 RNA gene database project: improved data processing and web-based tools. *Nucleic Acids*  
459 *Res* 2013; **41**: D590-6.
- 460 23. Edgar RC. UPARSE: highly accurate OTU sequences from microbial amplicon reads. *Nat*  
461 *Methods* 2013; **10**: 996–998.
- 462 24. Caporaso JG, Kuczynski J, Stombaugh J, Bittinger K, Bushman FD, Costello EK, et al.  
463 QIIME allows analysis of high-throughput community sequencing data. *Nat Methods* 2010;  
464 **7**: 335–336.
- 465 25. Gdanetz K, Benucci GMN, Vande Pol N, Bonito G. CONSTAX: a tool for improved  
466 taxonomic resolution of environmental fungal ITS sequences. *BMC Bioinformatics* 2017;  
467 **18**: 538.
- 468 26. UNITE Community. UNITE USEARCH/UTAX release. 2017.
- 469 27. Davis NM, Proctor DiM, Holmes SP, Relman DA, Callahan BJ. Simple statistical  
470 identification and removal of contaminant sequences in marker-gene and metagenomics  
471 data. *Microbiome* 2018; **6**: 226.
- 472 28. Edgar RC. UNOISE2: improved error-correction for Illumina 16S and ITS amplicon  
473 sequencing. *bioRxiv* 2016; 081257.
- 474 29. Shade A, Stopnisek N. Abundance-occupancy distributions to prioritize plant core  
475 microbiome membership. *Curr Opin Microbiol* 2019; **49**: 50–58.
- 476 30. Deng Y, Jiang Y-H, Yang Y, He Z, Luo F, Zhou J. Molecular ecological network analyses.

- 477 *BMC Bioinformatics* 2012; **13**: 113.
- 478 31. Shannon P, Markiel A, Ozier O, Baliga NS, Wang JT, Ramage D, et al. Cytoscape: A  
479 Software Environment for Integrated Models of Biomolecular Interaction Networks.  
480 *Genome Res* 2003; **13**: 2498–2504.
- 481 32. Singer E, Bonnette J, Kenaley SC, Woyke T, Juenger TE. Plant compartment and genetic  
482 variation drive microbiome composition in switchgrass roots. *Environ Microbiol Rep* 2019;  
483 **11**: 185–195.
- 484 33. Coleman-Derr D, Desgarennes D, Fonseca-Garcia C, Gross S, Clingenpeel S, Woyke T, et  
485 al. Plant compartment and biogeography affect microbiome composition in cultivated and  
486 native *Agave* species. *New Phytol* 2016; **209**: 798–811.
- 487 34. De Souza RSC, Okura VK, Armanhi JSL, Jorrín B, Lozano N, Da Silva MJ, et al. Unlocking  
488 the bacterial and fungal communities assemblages of sugarcane microbiome. *Sci Rep* 2016;  
489 **6**: 1–15.
- 490 35. Walters WA, Jin Z, Youngblut N, Wallace JG, Sutter J, Zhang W, et al. Large-scale  
491 replicated field study of maize rhizosphere identifies heritable microbes. *Proc Natl Acad Sci*  
492 *U S A* 2018; **115**: 7368–7373.
- 493 36. Wagner MR, Lundberg DS, del Rio TG, Tringe SG, Dangl JL, Mitchell-Olds T. Host  
494 genotype and age shape the leaf and root microbiomes of a wild perennial plant. *Nat*  
495 *Commun* 2016; **7**: 12151.
- 496 37. Xu J, Zhang Y, Zhang P, Trivedi P, Riera N, Wang Y, et al. The structure and function of  
497 the global citrus rhizosphere microbiome. *Nat Commun* 2018; **9**: 4894.
- 498 38. Edwards J, Johnson C, Santos-Medellín C, Lurie E, Podishetty NK, Bhatnagar S, et al.  
499 Structure, variation, and assembly of the root-associated microbiomes of rice. *Proc Natl*  
500 *Acad Sci U S A* 2015; **112**: E911-20.

- 501 39. Edwards JA, Santos-Medellín CM, Liechty ZS, Nguyen B, Lurie E, Eason S, et al.  
502 Compositional shifts in root-associated bacterial and archaeal microbiota track the plant life  
503 cycle in field-grown rice. *PLoS Biol* 2018; **16**: e2003862.
- 504 40. Fitzpatrick CR, Copeland J, Wang PW, Guttman DS, Kotanen PM, Johnson MTJ. Assembly  
505 and ecological function of the root microbiome across angiosperm plant species. *Proc Natl*  
506 *Acad Sci U S A* 2018; **115**: E1157–E1165.
- 507 41. Hamonts K, Trivedi P, Garg A, Janitz C, Grinyer J, Holford P, et al. Field study reveals core  
508 plant microbiota and relative importance of their drivers. *Environ Microbiol* 2018; **20**: 124–  
509 140.
- 510 42. Gomes EA, De Sousa SM, Oliveira CA. Root-Associated Microbiome of Maize Genotypes  
511 with Contrasting Phosphorus Use Efficiency. 2018; **2**: 129.
- 512 43. Estendorfer J, Stempfhuber B, Haury P, Vestergaard G, Rillig MC, Joshi J, et al. The  
513 Influence of Land Use Intensity on the Plant-Associated Microbiome of *Dactylis glomerata*  
514 *L.* *Front Plant Sci* 2017; **8**: 930.
- 515 44. Leff JW, Lynch RC, Kane NC, Fierer N. Plant domestication and the assembly of bacterial  
516 and fungal communities associated with strains of the common sunflower, *Helianthus*  
517 *annuus*. *New Phytol* 2017; **214**: 412–423.
- 518 45. Lundberg DS, Lebeis SL, Herrera Paredes S, Yourstone S, Gehring J, Malfatti S, et al.  
519 Defining the core *Arabidopsis thaliana* root microbiome. *Nature* 2012; **488**.
- 520 46. Levy A, Salas Gonzalez I, Mittelviehhaus M, Clingenpeel S, Herrera Paredes S, Miao J, et al.  
521 Genomic features of bacterial adaptation to plants. *Nat Genet* 2018; **50**: 138–150.
- 522 47. Grady KL, Sorensen JW, Stopnisek N, Guittar J, Shade A. Assembly and seasonality of core  
523 phyllosphere microbiota on perennial biofuel crops. *Nat Commun* 2019; **10**: 4135.
- 524 48. Shade A, Dunn RR, Blowes SA, Keil P, Bohannan BJM, Herrmann M, et al. Macroecology

- 525 to Unite All Life, Large and Small. *Trends Ecol Evol* 2018; **33**: 731–744.
- 526 49. Woodcock S, Van Der Gast CJ, Bell T, Lunn M, Curtis TP, Head IM, et al. Neutral  
527 assembly of bacterial communities. *FEMS Microbiol Ecol* 2007; **62**: 171–180.
- 528 50. Burns AR, Stephens WZ, Stagaman K, Wong S, Rawls JF, Guillemin K, et al. Contribution  
529 of neutral processes to the assembly of gut microbial communities in the zebrafish over host  
530 development. *ISME J* 2016; **10**: 655–664.
- 531 51. Gaston KJ, Blackburn TM, Greenwood JJD, Gregory RD, Quinn RM, Lawton JH.  
532 Abundance-occupancy relationships. *J Appl Ecol* 2000; **37**: 39–59.
- 533 52. Martiny JBH, Eisen JA, Penn K, Allison SD, Horner-Devine MC. Drivers of bacterial beta-  
534 diversity depend on spatial scale. *Proc Natl Acad Sci U S A* 2011; **108**: 7850–4.
- 535 53. Gumiere T, Durrer A, Bohannan BJM, Andreote FD. Biogeographical patterns in fungal  
536 communities from soils cultivated with sugarcane. *J Biogeogr* 2016; **43**: 2016–2026.
- 537 54. Talbot JM, Bruns TD, Taylor JW, Smith DP, Branco S, Glassman SI, et al. Endemism and  
538 functional convergence across the North American soil mycobiome. *Proc Natl Acad Sci*  
539 2014; **111**: 6341–6346.
- 540 55. Tedersoo L, Bahram M, Pöhlme S, Kõljalg U, Yorou NS, Wijesundera R, et al. Global  
541 diversity and geography of soil fungi. *Science (80- )* 2014; **346**.
- 542 56. Dawson W, Hör J, Egert M, van Kleunen M, Pester M. A Small Number of Low-abundance  
543 Bacteria Dominate Plant Species-specific Responses during Rhizosphere Colonization.  
544 *Front Microbiol* 2017; **8**: 975.
- 545 57. Agler MT, Ruhe J, Kroll S, Morhenn C, Kim S-T, Weigel D, et al. Microbial Hub Taxa Link  
546 Host and Abiotic Factors to Plant Microbiome Variation. *PLOS Biol* 2016; **14**: e1002352.
- 547 58. Trivedi P, Delgado-Baquerizo M, Trivedi C, Hamonts K, Anderson IC, Singh BK. Keystone  
548 microbial taxa regulate the invasion of a fungal pathogen in agro-ecosystems. *Soil Biol*



- 549 *Biochem* 2017; **111**: 10–14.
- 550 59. Shi S, Nuccio EE, Shi ZJ, He Z, Zhou J, Firestone MK. The interconnected rhizosphere:  
551 High network complexity dominates rhizosphere assemblages. *Ecol Lett* 2016; **19**: 926–936.
- 552 60. Carlström CI, Field CM, Bortfeld-Miller M, Müller B, Sunagawa S, Vorholt JA. Synthetic  
553 microbiota reveal priority effects and keystone strains in the Arabidopsis phyllosphere. *Nat*  
554 *Ecol Evol* 2019; **3**: 1445–1454.
- 555 61. Toju H, Peay KG, Yamamichi M, Narisawa K, Hiruma K, Naito K, et al. Core microbiomes  
556 for sustainable agroecosystems. *Nat Plants* 2018; **4**: 247–257.
- 557 62. Durán P, Thiergart T, Garrido-Oter R, Agler M, Kemen E, Schulze-Lefert P, et al. Microbial  
558 Interkingdom Interactions in Roots Promote Arabidopsis Survival. *Cell* 2018; **175**: 973-  
559 983.e14.
- 560 63. Wagg C, Schlaeppi K, Banerjee S, Kuramae EE, van der Heijden MGA. Fungal-bacterial  
561 diversity and microbiome complexity predict ecosystem functioning. *Nat Commun* 2019; **10**:  
562 1–10.
- 563 64. Guimerà R, Nunes Amaral LA. Functional cartography of complex metabolic networks.  
564 *Nature* 2005; **433**: 895–900.
- 565 65. Lemanceau P, Blouin M, Muller D, Moënne-Loccoz Y. Let the Core Microbiota Be  
566 Functional. *Trends Plant Sci* . 2017. Elsevier Ltd. , **22**: 583–595
- 567 66. Risely A. Applying the core microbiome to understand host-microbe systems. *J Anim Ecol*  
568 2020.
- 569 67. Andrews M, Andrews ME, Andrews M, Andrews ME. Specificity in Legume-Rhizobia  
570 Symbioses. *Int J Mol Sci* 2017; **18**: 705.
- 571 68. Wang Q, Liu J, Zhu H. Genetic and molecular mechanisms underlying symbiotic specificity  
572 in legume-rhizobium interactions. *Front Plant Sci* . 2018. Frontiers Media S.A. , **9**

- 573 69. Skouri-Panet F, Benzerara K, Cosmidis J, Férard C, Caumes G, De Luca G, et al. In vitro  
574 and in silico evidence of phosphatase diversity in the biomineralizing bacterium *Ramlibacter*  
575 *tataouinensis*. *Front Microbiol* 2018; **8**: 2592.
- 576 70. Lee JS, Lee KC, Kim KK, Lee B. Complete genome sequence of the *Variibacter*  
577 *gotjawalensis* GJW-30T from soil of lava forest, Gotjawal. *J Biotechnol* 2016; **218**: 64–65.
- 578 71. Khan AL, Waqas M, Kang SM, Al-Harrasi A, Hussain J, Al-Rawahi A, et al. Bacterial  
579 endophyte *Sphingomonas* sp. LK11 produces gibberellins and IAA and promotes tomato  
580 plant growth. *J Microbiol* 2014; **52**: 689–695.
- 581 72. Aylward FO, McDonald BR, Adams SM, Valenzuela A, Schmidt RA, Goodwin LA, et al.  
582 Comparison of 26 sphingomonad genomes reveals diverse environmental adaptations and  
583 biodegradative capabilities. *Appl Environ Microbiol* 2013; **79**: 3724–33.
- 584 73. Xu L, Naylor D, Dong Z, Simmons T, Pierroz G, Hixson KK, et al. Drought delays  
585 development of the sorghum root microbiome and enriches for monoderm bacteria. *Proc*  
586 *Natl Acad Sci* 2018; **115**: E4284–E4293.
- 587
- 588

589 **Figure Legends**

590 **Fig. 1:** Abundance-occupancy distributions were used to identify core members of the rhizosphere  
591 microbiome for bacteria/archaea (A) and fungi (B). Taxa exclusive to a genotype are indicated in  
592 orange (CELRK) or black (Eclipse), and taxa shared across both genotypes are white. The solid  
593 line represents the fit of the neutral model, and the dashed line is 95% confidence around the model  
594 prediction. Taxa with an occupancy of 1 (i.e., detected in all samples) were considered members of  
595 the core. Relative abundance of these taxa is represented as boxplots, grouped by order and number  
596 of taxa therein (C, D). Panels C and D are color-coded by phyla level.

597  
598 **Fig. 2:** A global core rhizosphere microbiome. There were 3361 shared bacterial/archaeal taxa  
599 across U.S. and Colombia rhizosphere samples, suggesting highly similar recruitment across  
600 continental scales. Forty-eight taxa were detected in all samples of both datasets, as depicted by the  
601 Venn diagram (A), and included many Proteobacteria (B). Relative abundance of the 48 U.S.-  
602 Colombia core taxa is represented as boxplots (left panel), grouped by order and dataset  
603 (Colombia/U.S.). Number of taxa per order is represented as bars (right panel). Labels on the y-axis  
604 and bars are color-coded by phylum level.

605  
606 **Fig. 3:** Relative abundance of core taxa in the root system of the common bean during plant  
607 development by root compartment and growing location. The combined relative abundance of 48  
608 core taxa is significantly higher in the rhizoplane (green) compared to the rhizosphere (orange) and  
609 does not show plant development dependence (A – upper panel). The combined relative abundance  
610 of remaining core taxa specific to the U.S. (n=210), tend to be high throughout the plant  
611 development but are equally abundant in both compartments (A - lower panel). Stars above box  
612 plots represent statistical significances as determined by Wilcoxon test (\*\*\*\*  $\leq 0.0001$ , \*\*\*  $\leq$

613 0.001, \*\*  $\leq 0.01$ , \*  $\leq 0.05$ ). Z-score normalized relative abundance of the 48 core taxa across plant  
614 development, compartments and growing location (B). Taxa on the y-axis are arranged by their  
615 classification at the phylum level.

616

617 **Fig. 4:** Network co-occurrence analysis shows that core rhizosphere microbiome members are  
618 predominantly classified as peripheral taxa that are weakly connected, and generally clustering by  
619 the growing location. The network depicts only clusters of modules that were connected by more  
620 than 6 nodes (A). Nodes shape is representing domain associations (archaeal, bacterial or fungal)  
621 and node size is proportional to its total number of connecting edges (A). The four largest modules  
622 are generally reflective of community biogeography and distinguished by color (A). The within-  
623 ( $Z_i$ ) and among- ( $P_i$ ) module connectivity plot was used to identify module ( $P_i < 0.62$ ,  $Z_i > 0.25$ ) or  
624 network hub taxa ( $P_i > 0.62$ ,  $Z_i > 2.5$ ), as well as connector ( $P_i > 0.62$ ,  $Z_i < 2.5$ ) and peripheral taxa (B).  
625 The density plots surrounding the  $Z_i$ - $P_i$  plot represent core (green) and non-core taxa (black) (B).  
626 The relative abundances of taxa within each module is represented in box plots (C).

627

## 628 **Supporting Figure legends**

629 **Fig. S1:** Sequencing depth and rarefaction curves for 16S rRNA (A,B) and ITS (C, D) dataset from  
630 samples collected in 2017. The red splitted line represents the rarefaction threshold. Note that we  
631 submitted amplicons for sequencing from the 2017 sampling effort twice which resulted in the  
632 sample to sample variation in read depth (rhizosphere 16S rRNA samples sequenced first followed  
633 by the ITS amplicons with addition of the root-associated samples).

634

635 **Fig. S2:** Alpha diversity indices for the 16S RNA (A, B) and ITS (C, D) datasets. Represented are  
636 rich-ness, Shannon and Pielou indices measured by growing location (A, C) and bean genotype (B,  
637 D). For statistical comparison of the pairs we used ANOVA (A, C) or Wilcoxon test (B, D).

638  
639 **Fig. S3:** Growing location drives bacterial/archaeal (A) and fungal (B) microbiome structure of the  
640 common bean rhizosphere. The principal coordinate analysis (PCoA) is based on Bray-Curtis  
641 distances. Growing location is indicated by color and plant genotype is indicated by shape shapes  
642 (diamond=CELRK, circle=Eclipse, square=root zone soil). The strength of statistically significant  
643 (p-value < 0.01) explanatory variables are shown as the length of fitted vectors.

644  
645 **Fig S4:** Community composition (A, C) and number of shared taxa between sites represent as Venn  
646 diagrams (B, D). The 16S rRNA dataset is represented in the top panels (A, B) and ITS in the lower  
647 panels (C, D). The bar charts are colored based on the phylum association (phyla represented by  
648 relative abundance < .05 are grouped and labelled as other). For Venn diagrams, samples were  
649 grouped by the growing location and root zone samples were removed.

650  
651 **Fig. S5:** Analysis of ZOTUs represented by each identified core OTU. 48 core OTUs were  
652 represented by as few as 4 ZOTUs and by up to 35 ZOTUs. For every OTU we found at least one  
653 ZOTU with occupancy = 1 and all of them, except of 2 ZOTUs, had also the highest relative  
654 abundance among them. Points are color coded by their presence, red representing those with  
655 occupancy < 1 and blue for ZOTUs with occupancy of 1. The OTUs on the x-axis are ordered  
656 alphabetically.

657

658 **Fig. S6:** Occupancy of core OTUs in the development study. Occupancy is represented by color  
659 and size.

660

661 **Fig. S7:** Comparison of relative abundance of the 48 core OTUs between the DNA isolation  
662 methods used in the development study (G=Griffith, P=PowerSoil). Statistical difference,  
663 determined by Wilcoxon test, is represented as star symbol (\*<0.05, \*\*<0.01, \*\*\*<0.001). The  
664 pints are color coded by sample they derived from.

665

666 **Fig. S8:** The effect of isolation method on alpha and beta diversity. For alpha diversity richness,  
667 Shannon and Pielou indices are presented (A). For the principal coordinates analysis, Bray-Curtis  
668 distance matrix was used. Symbols are colored by samples. Wilcoxon test was used to determine  
669 statistical differences between isolation methods for the alpha diversity metrics (\*<0.05).  
670 PERMANOVA was used to determine the effect of isolation method on community structure.

671

672

673 **Tables**

674 **Table 1:** Description of geographical, managemental and soil properties of the common bean  
 675 growing locations included in the study.

| Sample same | Growing location                                     | Elevation | Bean genotype     | Weather (T, precipitation)* | Rotation history                | Fertilization (per acre)                           | Irrigation | pH          | Nitrogen (%)  | Organic matter (%) |
|-------------|------------------------------------------------------|-----------|-------------------|-----------------------------|---------------------------------|----------------------------------------------------|------------|-------------|---------------|--------------------|
| SVREC       | Saginaw Valley Research and Extension Center, MI, US | 190 m     | CELRK             | 24.5°C, 5.7 mm              | Common bean, wheat, maize       | Synthetic (400lbs of 15N-5 P-13K)                  | None       | 7.7 (± 0.1) | 0.13 (± 0.00) | 2.33 (± 0.06)      |
| MRC         | Montcalm Research Center, MI, US                     | 280 m     | Eclipse           | 24°C, 7.4 mm                | Common bean, maize, potato      | Synthetic (200lbs of 19N-0P-19K)                   | Yes        | 5.9 (± 0.4) | 0.10 (± 0.01) | 2.13 (± 0.06)      |
| NE          | Scottsbluff, NE, US                                  | 1200 m    | CELRK and Eclipse | 27°C, 2.18 mm               | Common bean, maize, common bean | None                                               | Yes        | 7.9 (± 0.1) | 0.07 (± 0.01) | 1.39 (± 0.18)      |
| CO          | ARDEC, Fort Collins, CO, US                          | 1536 m    | CELRK and Eclipse | 31°C, 1.4 mm **             | Common bean, maize, barley      | Organic (220lbs urea (2016), 3 tons manure (2015)) | Yes        | 8.1 (± 0.2) | 0.11 (± 0.00) | 1.7 (± 0.15)       |
| WA          | WSU, Othello, WA, US                                 | 320 m     | CELRK and Eclipse | 26.3°C, 0.2 mm              | Common bean, maize, wheat       | Synthetic (40lbs N/20lbs P/10lbs ZN205)            | Yes        | 6.1 (± 0.4) | 0.08 (± 0.01) | 1.78 (± 0.10)      |

676 \* Temperature (as max air temperature) and precipitation are averaged for the period between May  
 677 1<sup>st</sup> and July 31<sup>st</sup> 2017.

678 \*\* Data available only for the period between Jun 28<sup>th</sup> and Jul 31<sup>st</sup> 2017.

679

680 **Supporting Table legends**

681 **Table S1:** PERMANOVA results for the 16S rRNA and ITS data. Highly correlated or/and  
 682 statistically significant values are highlighted in bold.

683

684 **Table S2:** 20 differentially abundant OTUs between the two plant genotypes as identified by using  
 685 DESeq2 (Love et al. 2014).

686

687 **Table S3:** Sloan neutral model summary.

688

689 **Table S4:** List of 48 core taxa and their taxonomic classification.

690

691 **Table S5:** Occupancy of core OTUs in agricultural, natural (forest) soils or when combined.

692 Results are based on the re-analysis of the data from the Pérez-Jaramillo et al. 2019. OTUs with

693 occupancy of 1 in both soils are highlighted in orange. Additional to the number we used green

694 gradient shading to represents the occupancy of each OTU.

695

696 **Table S6:** Summary of network properties of actual and random network.

697

698



699 **Figures**

700 **Fig. 1:** Abundance-occupancy distributions were used to identify core members of the rhizosphere  
 701 microbiome for bacteria/archaea (A) and fungi (B). Taxa exclusive to a genotype are indicated in  
 702 orange (CELRK) or black (Eclipse), and taxa shared across both genotypes are white. The solid  
 703 line represents the fit of the neutral model, and the dashed line is 95% confidence around the model  
 704 prediction. Taxa with an occupancy of 1 (i.e., detected in all samples) were considered members of  
 705 the core. Relative abundance of these taxa is represented as boxplots, grouped by order and number  
 706 of taxa therein (C, D). Panels C and D are color-coded by phyla level.

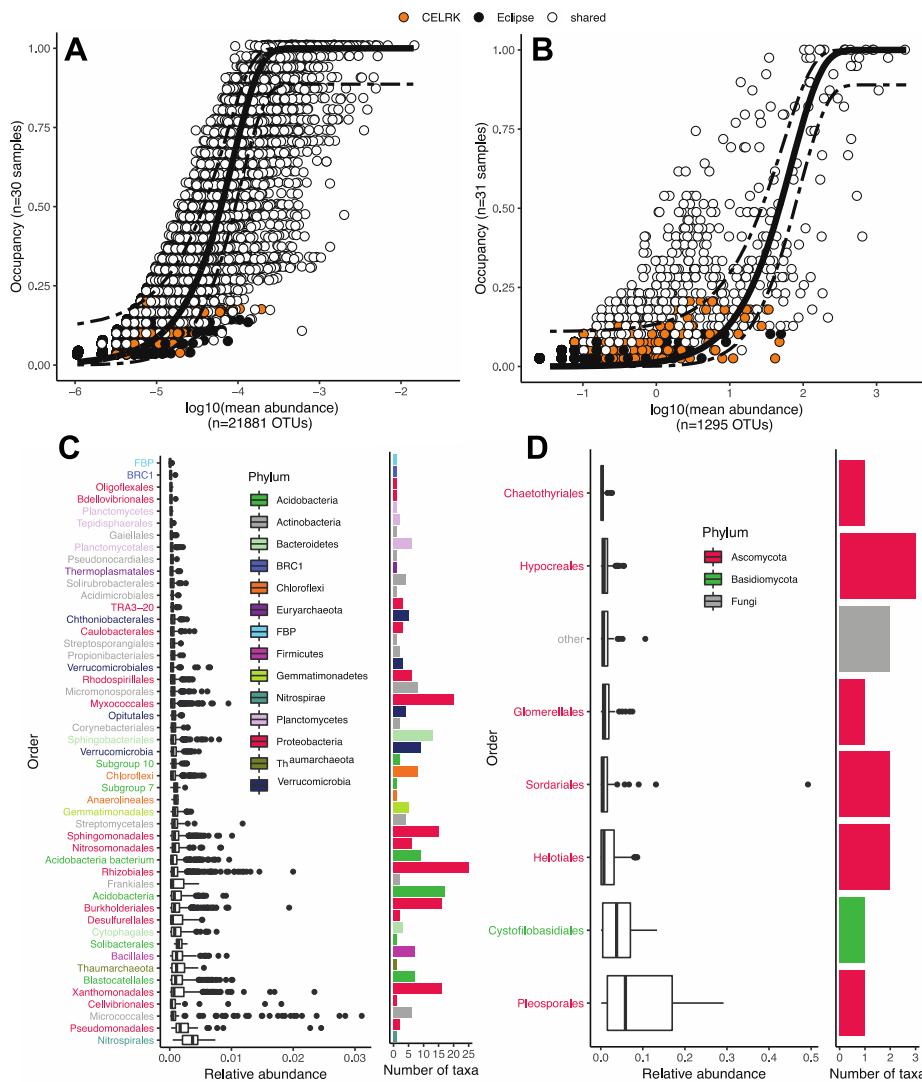

707

708 **Fig. 2:** A global core rhizosphere microbiome. There were 3361 shared bacterial/archaeal taxa  
 709 across U.S. and Colombia rhizosphere samples, suggesting highly similar recruitment across  
 710 continental scales. Forty-eight taxa were detected in all samples of both datasets, as depicted by the  
 711 Venn diagram (A), and included many Proteobacteria (B). Relative abundance of the 48 U.S.-  
 712 Colombia core taxa is represented as boxplots (left panel), grouped by order and dataset  
 713 (Colombia/U.S.). Number of taxa per order is represented as bars (right panel). Labels on the y-axis  
 714 and bars are color-coded by phylum level.

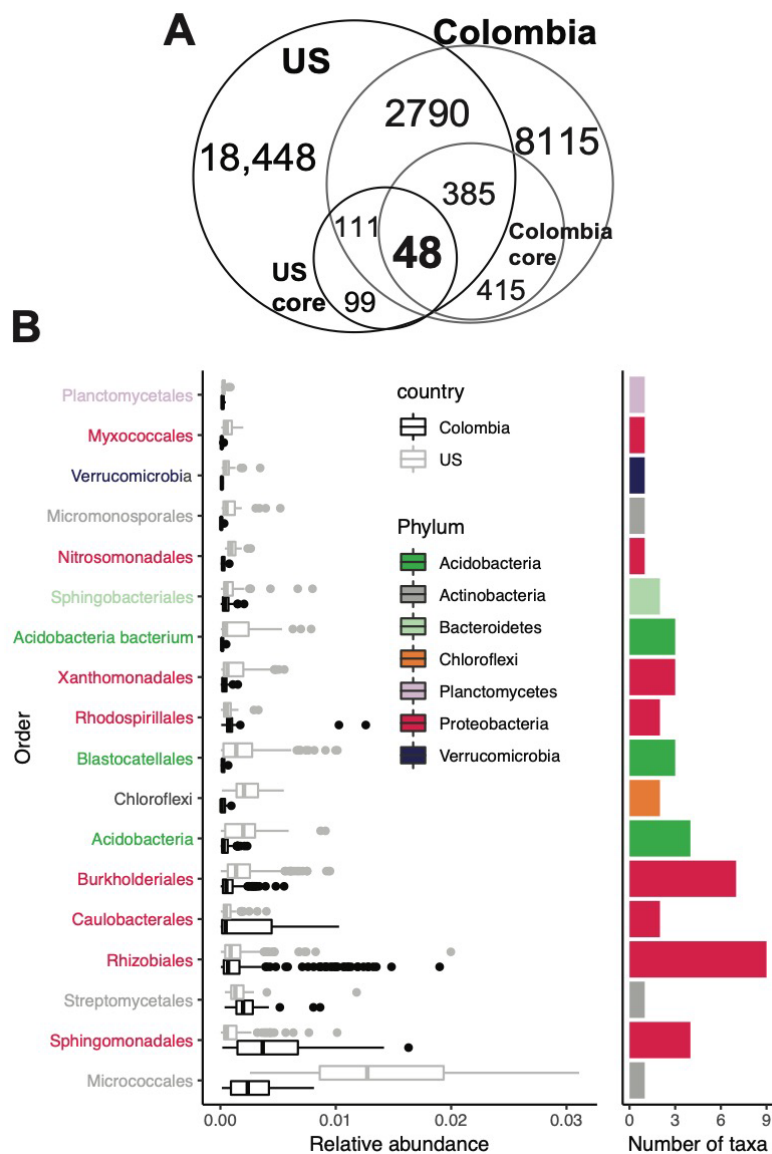

715

716



728 **Fig. 4:** Network co-occurrence analysis shows that core rhizosphere microbiome members are  
 729 predominantly classified as peripheral taxa that are weakly connected, and generally clustering by  
 730 the growing location. The network depicts only clusters of modules that were connected by more  
 731 than 6 nodes (A). Nodes shape is representing domain associations (archaeal, bacterial or fungal)  
 732 and node size is proportional to its total number of connecting edges (A). The four largest modules  
 733 are generally reflective of community biogeography and distinguished by color (A). The within-  
 734 ( $Z_i$ ) and among- ( $P_i$ ) module connectivity plot was used to identify module ( $P_i < 0.62$ ,  $Z_i > 0.2.5$ ) or  
 735 network hub taxa ( $P_i > 0.62$ ,  $Z_i > 2.5$ ), as well as connector ( $P_i > 0.62$ ,  $Z_i < 2.5$ ) and peripheral taxa (B).  
 736 The density plots surrounding the  $Z_i$ - $P_i$  plot represent core (green) and non-core taxa (black) (B).  
 737 The relative abundances of taxa within each module is represented in box plots (C).

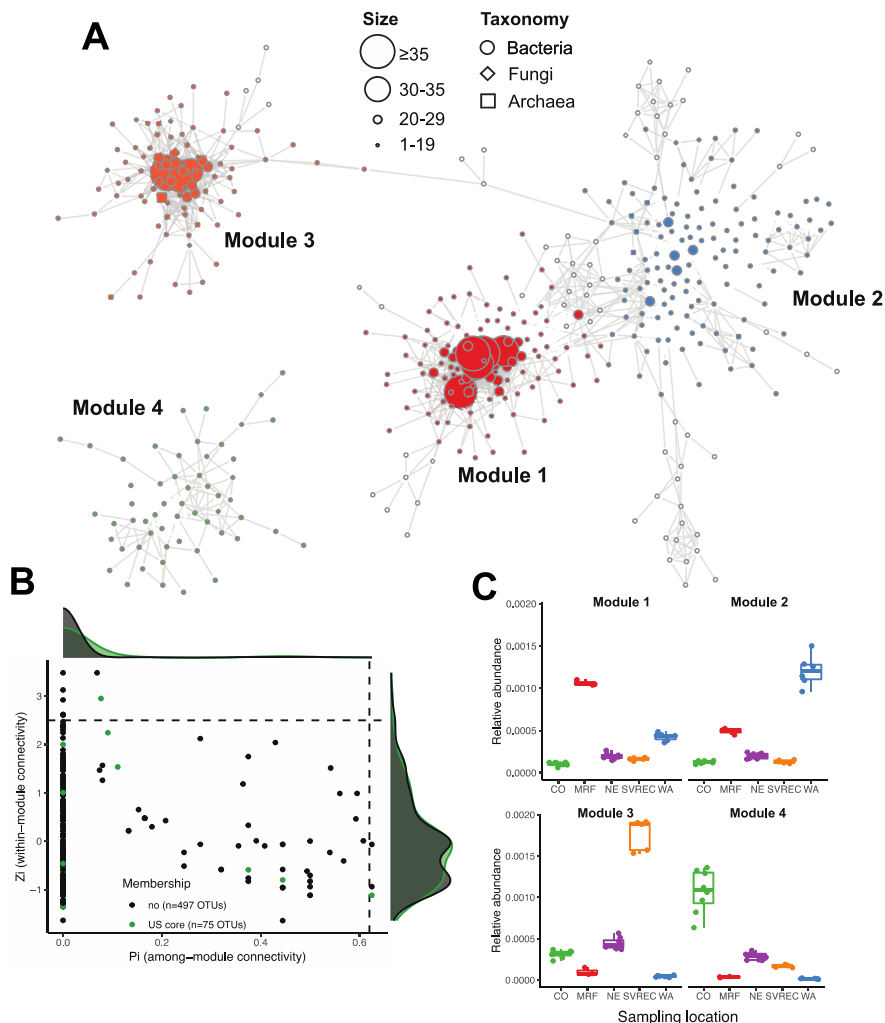

738
